# Supplementary material
Source: PubMed Central journal article supplement (PMC4249094)
Supplement: JVI.01801-14_zjv999099749so1.pdf [file JVI.01801-14_zjv999099749so1.pdf]

## Supplementary information

### Table of content

**Supplementary Table S1:** Purity of the cell populations isolated from 11 SFV-infected individuals

**Supplementary Figure S1:** Alignment of SFV *bet* DNA coding sequence from 11 SFV-infected hunters.

**Supplementary Figure S2:** Alignment of SFV Bet amino-acid sequences from 11 SFV-infected hunters.

## Supplementary Table S1: Purity of the cell populations isolated from 11 SFV-infected individuals

PBMC populations from the 11 SFV-infected individuals (sampled at two time points for BAD348, BAD468 and BAK74) were purified and stained with anti-CD3-FITC, anti-CD14-PE, anti-CD16-V450, anti-CD56-PC7, anti-CD8-APC, anti-CD4-APC-H7, and anti-CD20-PC5. LIVE/DEAD® Fixable Dead Cell Stain Kit was used to identify viable cells. Cells were gated by forward scatter and side scatter, and viable cells were selected based on live/dead labeling. CD4+ and CD8+ cells were defined in the CD3+ population. CD20+, CD14+, CD16+, and CD56+ cells were defined in the CD3- population. The purity of the isolated subset is indicated in red.

| Individual           | Cell subset | CD3+ CD4+<br>(% among<br>live cells) | CD3+ CD8+<br>(% among<br>live cells) | CD20+<br>(% among<br>live cells) | CD14+<br>(% among<br>live cells) | CD16+ or<br>CD56+<br>(% among<br>live cells) |
|----------------------|-------------|--------------------------------------|--------------------------------------|----------------------------------|----------------------------------|----------------------------------------------|
| AKO394               | CD4+        | 94.7                                 | 2.6                                  | 0.0                              | 0.1                              | 2.1                                          |
|                      | CD8+        | 1.1                                  | 81.3                                 | 0.0                              | 0.1                              | 18.1                                         |
|                      | CD19+       | 3.9                                  | 3.6                                  | 76.2                             | 0.7                              | 4.3                                          |
|                      | CD14+       | 4.5                                  | 5.3                                  | 0.2                              | 58.5                             | 21.0                                         |
|                      | CD56+       | 0.7                                  | 4.7                                  | 0.2                              | 0.5                              | 91.2                                         |
| BAD348<br>14/03/2013 | CD4+        | 90.0                                 | 1.4                                  | 0.1                              | 0.1                              | 3.5                                          |
|                      | CD8+        | 3.2                                  | 88.5                                 | 0.1                              | 0.9                              | 4.8                                          |
|                      | CD19+       | 2.6                                  | 1.9                                  | 70.6                             | 1.3                              | 2.1                                          |
|                      | CD14+       | 2.6                                  | 1.4                                  | 2.2                              | 71.1                             | 16.3                                         |
|                      | CD56+       | 4.2                                  | 30.3                                 | 0.4                              | 3.2                              | 51.7                                         |
| BAD348<br>19/11/2013 | CD4+        | 96.7                                 | 1.2                                  | 0.0                              | 1.6                              | 0.6                                          |
|                      | CD8+        | 2.2                                  | 94.1                                 | 0.3                              | 1.6                              | 1.7                                          |
|                      | CD19+       | 0.8                                  | 0.9                                  | 88.3                             | 5.7                              | 2.2                                          |
|                      | CD14+       | 5.8                                  | 2.6                                  | 0.6                              | 87.8                             | 4.4                                          |
|                      | CD56+       | 3.1                                  | 30.6                                 | 2.5                              | 9.8                              | 47.1                                         |
| BAD447               | CD4+        | 93.2                                 | 2.2                                  | 0.0                              | 0.0                              | 2.3                                          |
|                      | CD8+        | 1.5                                  | 96.8                                 | 0.6                              | 0.3                              | 0.9                                          |
|                      | CD19+       | 2.2                                  | 4.6                                  | 85.4                             | 1.0                              | 0.8                                          |
|                      | CD14+       | 5.6                                  | 8.0                                  | 1.1                              | 50.9                             | 28.3                                         |
|                      | CD56+       | 2.5                                  | 7.3                                  | 2.1                              | 22.9                             | 59.7                                         |
| BAD456               | CD4+        | 90.8                                 | 2.5                                  | 0.0                              | 0.0                              | 5.0                                          |
|                      | CD8+        | 2.6                                  | 77.6                                 | 1.5                              | 1.1                              | 18.6                                         |
|                      | CD19+       | 1.8                                  | 9.1                                  | 77.1                             | 1.3                              | 3.1                                          |
|                      | CD14+       | 5.4                                  | 4.9                                  | 1.2                              | 60.5                             | 25.9                                         |
|                      | CD56+       | 2.6                                  | 17.2                                 | 0.9                              | 4.4                              | 71.3                                         |
| BAD463               | CD4+        | 96.5                                 | 1.0                                  | 0.0                              | 1.7                              | 0.8                                          |
|                      | CD8+        | 5.9                                  | 91.3                                 | 1.0                              | 2.3                              | 3.6                                          |
|                      | CD19+       | 2.8                                  | 4.8                                  | 80.4                             | 7.9                              | 1.9                                          |
|                      | CD14+       | 8.7                                  | 2.9                                  | 0.5                              | 82.1                             | 4.4                                          |
|                      | CD56+       | 3.6                                  | 16.2                                 | 0.4                              | 21.8                             | 50.5                                         |
| BAD468<br>04/09/2012 | CD4+        | 96.4                                 | 0.4                                  | 0.1                              | 0.2                              | 1.3                                          |
|                      | CD8+        | 1.1                                  | 84.1                                 | 0.3                              | 0.5                              | 11.5                                         |
|                      | CD19+       | 3.1                                  | 2.6                                  | 94.9                             | 0.9                              | 0.9                                          |
|                      | CD14+       | 2.0                                  | 0.7                                  | 2.1                              | 78.5                             | 9.5                                          |
|                      | CD56+       | 2.6                                  | 8.2                                  | 1.3                              | 18.7                             | 62.6                                         |

|               |                                             |             |             |             |             |             |
|---------------|---------------------------------------------|-------------|-------------|-------------|-------------|-------------|
| <b>BAD468</b> | <b>CD4+</b>                                 | <b>95.0</b> | 1.0         | 0.0         | 0.0         | 2.4         |
| 15/11/2013    | <b>CD8+</b>                                 | 2.2         | <b>87.0</b> | 0.8         | 0.2         | 9.7         |
|               | <b>CD19+</b>                                | 2.6         | 3.6         | <b>80.9</b> | 2.6         | 9.5         |
|               | <b>CD14+</b>                                | 6.8         | 3.4         | 1.2         | <b>54.4</b> | 28.3        |
|               | <b>CD56+</b>                                | 2.2         | 6.1         | 8.6         | 11.2        | <b>68.7</b> |
|               | <b>BAK177</b>                               | <b>CD4+</b> | <b>87.9</b> | 1.2         | 0.3         | 0.7         |
|               | <b>CD8+</b>                                 | 0.6         | <b>67.4</b> | 0.4         | 1.0         | 26.8        |
|               | <b>CD19+</b>                                | 0.8         | 0.7         | <b>75.3</b> | 0.9         | 2.1         |
|               | <b>CD14+</b>                                | 1.0         | 0.9         | 3.7         | <b>54.9</b> | 32.7        |
|               | <b>CD56+</b>                                | 0.2         | 5.3         | 0.4         | 1.0         | <b>88.9</b> |
|               | <b>BAK232</b>                               | <b>CD4+</b> | <b>94.9</b> | 1.6         | 0.0         | 2.8         |
|               | <b>CD8+</b>                                 | 2.1         | <b>91.0</b> | 1.8         | 2.1         | 3.1         |
|               | <b>CD19+</b>                                | 2.1         | 8.2         | <b>71.0</b> | 11.2        | 1.8         |
|               | <b>CD14+</b>                                | 6.5         | 3.9         | 0.3         | <b>90.2</b> | 2.2         |
|               | <b>CD56+</b>                                | 2.0         | 13.5        | 1.4         | 17.2        | <b>63.3</b> |
|               | <b>BAK55</b>                                | <b>CD4+</b> | <b>93.0</b> | 1.1         | 0.0         | 2.2         |
|               | <b>CD8+</b>                                 | 1.7         | <b>93.3</b> | 0.5         | 0.6         | 4.6         |
|               | <b>CD19+</b>                                | 2.8         | 9.4         | <b>72.8</b> | 7.6         | 2.8         |
|               | <b>CD14+</b>                                | 10.2        | 2.2         | 0.2         | <b>84.2</b> | 2.8         |
|               | <b>CD56+</b>                                | 1.1         | 16.9        | 0.7         | 3.2         | <b>75.6</b> |
|               | <b>BAK74</b>                                | <b>CD4+</b> | <b>97.4</b> | 0.6         | 0.0         | 0.1         |
| 04/09/2012    | <b>CD8+</b>                                 | 2.0         | <b>92.5</b> | 0.3         | 0.4         | 4.6         |
|               | <b>CD19+</b>                                | 1.8         | 2.5         | <b>90.6</b> | 0.5         | 0.9         |
|               | <b>CD14+</b>                                | 3.0         | 0.6         | 0.6         | <b>87.7</b> | 3.6         |
|               | <b>CD56+</b>                                | 2.4         | 44.1        | 0.1         | 1.0         | <b>40.6</b> |
|               | <b>BAK74</b>                                | <b>CD4+</b> | <b>98.2</b> | 0.6         | 0.0         | 0.7         |
| 15/11/2013    | <b>CD8+</b>                                 | 1.4         | <b>96.3</b> | 0.7         | 0.3         | 1.5         |
|               | <b>CD19+</b>                                | 1.2         | 4.3         | <b>80.8</b> | 2.2         | 3.4         |
|               | <b>CD14+</b>                                | 3.5         | 0.7         | 0.3         | <b>94.8</b> | 0.6         |
|               | <b>CD56+</b>                                | 2.2         | 43.0        | 0.6         | 3.6         | <b>38.1</b> |
|               | <b>LOBAK2</b>                               | <b>CD4+</b> | <b>90.7</b> | 5.1         | 0.0         | 0.1         |
|               | <b>CD8+</b>                                 | 5.0         | <b>89.0</b> | 1.0         | 0.6         | 4.5         |
|               | <b>CD19+</b>                                | 2.9         | 7.3         | <b>74.5</b> | 1.0         | 1.4         |
|               | <b>CD14+</b>                                | 2.6         | 4.8         | 0.6         | <b>69.0</b> | 21.6        |
|               | <b>CD56+</b>                                | 3.8         | 34.2        | 0.5         | 9.3         | <b>50.6</b> |
|               | <b>Mean (all individuals)</b>               | <b>CD4+</b> | <b>94.0</b> | 1.6         | 0.1         | 0.7         |
|               | <b>CD8+</b>                                 | 2.3         | <b>87.9</b> | 0.7         | 0.8         | 8.1         |
|               | <b>CD19+</b>                                | 2.2         | 4.5         | <b>79.9</b> | 3.2         | 2.7         |
|               | <b>CD14+</b>                                | 4.9         | 3.0         | 1.1         | <b>73.2</b> | 14.4        |
|               | <b>CD56+</b>                                | 2.4         | 19.8        | 1.4         | 9.1         | <b>61.4</b> |
|               | <b>Standard deviation (all individuals)</b> | <b>CD4+</b> | 3.1         | 1.2         | 0.1         | 1.0         |
|               | <b>CD8+</b>                                 | 1.5         | 8.1         | 0.5         | 0.7         | 7.9         |
|               | <b>CD19+</b>                                | 0.9         | 2.9         | 7.5         | 3.5         | 2.2         |
|               | <b>CD14+</b>                                | 2.6         | 2.2         | 1.0         | 15.2        | 11.7        |
|               | <b>CD56+</b>                                | 1.1         | 14.0        | 2.2         | 8.0         | 16.4        |





|        |             |     |     |     |     |     |     |     |     |     |     |     |     |     |     |     |     |     |     |     |     |     |     |     |     |     |
|--------|-------------|-----|-----|-----|-----|-----|-----|-----|-----|-----|-----|-----|-----|-----|-----|-----|-----|-----|-----|-----|-----|-----|-----|-----|-----|-----|
| AKO394 | <b>1051</b> | ATA | GAA | GCT | TAT | GGA | CCT | CAG | AGA | GGA | AGT | AGC | GAG | GAG | AGG | GTG | TGG | TGG | AAA | ACC | ACT | AGT | ACC | CTA | GGG | AAG |
| BAD348 |             |     |     |     |     |     |     |     | G   |     |     |     |     |     |     |     |     |     |     |     |     |     |     |     |     |     |
| BAD447 |             |     |     |     |     |     |     |     |     |     |     |     |     |     |     |     |     |     |     |     |     |     |     |     |     |     |
| BAD456 |             |     |     |     |     |     |     |     |     |     |     |     |     |     |     |     |     |     |     |     |     |     |     |     |     |     |
| BAD463 |             |     |     |     |     |     |     |     |     |     |     |     |     |     |     |     |     |     |     |     |     |     | G   |     |     |     |
| BAD468 |             |     |     |     |     |     |     |     |     |     |     |     |     |     |     |     |     |     |     |     |     |     |     |     |     |     |
| BAK177 |             |     |     |     |     |     |     |     |     |     |     |     |     |     |     |     |     |     |     |     |     |     |     |     |     |     |
| BAK232 |             |     |     |     |     |     |     |     |     |     |     |     |     |     |     |     |     |     |     |     |     |     |     |     |     |     |
| BAK55  |             |     |     |     |     |     |     |     |     |     |     |     |     |     |     |     |     |     |     |     |     |     |     |     |     |     |
| BAK74  |             |     |     |     |     |     |     |     |     |     |     |     |     |     |     |     |     |     |     |     |     |     |     |     |     |     |
| LOBAK2 |             |     |     |     |     |     |     |     |     |     |     |     |     |     |     |     |     |     |     |     |     |     |     |     |     |     |

|        |             |     |     |     |     |     |     |     |     |     |     |     |     |     |     |     |     |     |     |     |     |     |     |     |     |     |
|--------|-------------|-----|-----|-----|-----|-----|-----|-----|-----|-----|-----|-----|-----|-----|-----|-----|-----|-----|-----|-----|-----|-----|-----|-----|-----|-----|
| AKO394 | <b>1125</b> | GAT | GAA | GAA | TAT | TAT | AGA | AGT | GAG | GGA | GAA | GAA | GAA | TGT | TTC | CCC | AAC | AGT | CCT | GCT | CCT | CAT | CGC | CGT | ACT | TGG |
| BAD348 |             |     | G   |     |     | C   | C   | G   |     |     | G   |     |     | G   |     |     |     |     |     |     |     |     |     |     |     |     |
| BAD447 |             |     | G   |     |     |     |     |     |     |     |     |     |     |     |     |     |     |     |     |     |     |     |     |     |     |     |
| BAD456 |             |     | G   |     |     |     |     |     |     |     |     |     |     |     |     |     |     |     |     |     |     |     |     |     |     |     |
| BAD463 |             |     | G   |     |     |     |     |     |     |     |     |     |     |     |     |     |     |     |     |     |     |     |     |     |     |     |
| BAD468 |             |     | G   |     |     | C   | C   | G   |     |     | G   |     |     | G   |     |     |     |     |     |     |     |     |     |     |     |     |
| BAK177 |             |     | G   |     |     |     |     |     |     |     |     |     |     |     |     |     |     |     |     |     |     |     |     |     | T   |     |
| BAK232 |             |     | G   |     |     |     |     |     |     |     |     |     |     |     |     |     |     |     |     |     |     |     |     |     |     |     |
| BAK55  |             |     | G   |     |     | C   | C   | G   |     |     | G   |     |     | G   |     |     |     |     |     |     |     |     |     |     |     |     |
| BAK74  |             |     | G   |     |     |     |     |     |     |     |     |     |     |     |     |     |     |     |     |     |     |     |     |     |     |     |
| LOBAK2 |             |     | G   |     |     | C   | C   | G   |     |     | G   |     |     | G   |     |     |     |     |     |     |     |     |     |     |     |     |

|        |             |     |     |     |     |     |     |     |     |     |     |     |     |     |     |     |     |     |     |     |     |     |     |     |     |     |
|--------|-------------|-----|-----|-----|-----|-----|-----|-----|-----|-----|-----|-----|-----|-----|-----|-----|-----|-----|-----|-----|-----|-----|-----|-----|-----|-----|
| AKO394 | <b>1201</b> | ACA | GAG | AGG | CAT | AAA | GTC | CTT | GCC | TTG | TCA | CCA | TTC | GCT | ACT | CCC | TCT | GAT | ATC | CAA | AAG | TGG | GTT | ACA | AGG | GCA |
| BAD348 |             |     |     | A   |     |     |     |     | T   |     |     |     |     |     |     |     |     |     |     |     |     |     |     |     |     |     |
| BAD447 |             |     |     |     |     |     |     |     |     |     |     |     |     |     |     |     |     |     |     |     |     |     |     |     |     |     |
| BAD456 |             |     |     |     |     |     | A   |     |     |     |     |     |     |     |     |     |     |     |     |     |     |     |     |     |     |     |
| BAD463 |             |     |     |     |     |     |     |     | T   |     |     |     |     |     |     |     | T   |     |     |     |     |     |     |     |     |     |
| BAD468 |             |     |     | A   |     |     |     |     | T   |     |     |     |     |     |     |     |     |     |     |     |     |     |     |     |     |     |
| BAK177 |             |     |     |     |     |     |     |     |     |     |     |     |     |     |     |     |     |     |     |     |     |     |     |     |     |     |
| BAK232 |             |     |     |     |     |     | A   |     |     |     |     |     |     |     |     |     |     |     |     |     |     |     |     |     |     |     |
| BAK55  |             |     |     | A   |     |     |     |     | T   |     |     |     |     |     |     |     |     |     |     |     |     |     |     |     |     |     |
| BAK74  |             |     |     |     |     |     |     |     |     |     |     |     |     |     |     |     |     |     |     |     |     |     |     |     |     |     |
| LOBAK2 |             |     |     | A   |     |     |     |     |     |     |     |     |     |     |     |     |     |     |     |     |     |     |     |     |     |     |

|        |             |     |     |     |     |     |     |     |     |     |     |     |     |     |     |     |     |     |     |     |     |     |     |     |     |     |
|--------|-------------|-----|-----|-----|-----|-----|-----|-----|-----|-----|-----|-----|-----|-----|-----|-----|-----|-----|-----|-----|-----|-----|-----|-----|-----|-----|
| AKO394 | <b>1276</b> | CTA | CCT | TAT | AAG | TGG | AAA | GTA | ATC | ACT | TCA | GAT | GGG | GAT | GAT | TAT | GTT | AGT | ATG | AGA | ACA | GTT | AAA | ACC | TTG | AAA |
| BAD348 |             |     |     | C   |     |     |     |     |     |     |     |     | A   |     |     |     |     |     |     |     |     |     |     |     |     |     |
| BAD447 |             |     |     |     |     |     |     |     |     |     |     |     |     |     |     |     |     |     |     |     |     |     |     |     |     |     |
| BAD456 |             |     |     |     |     |     |     |     |     |     |     |     |     |     |     |     |     |     |     |     |     |     |     |     |     |     |
| BAD463 |             |     |     |     |     |     |     |     |     |     |     |     |     |     |     |     |     |     |     |     |     |     |     |     |     |     |
| BAD468 |             |     |     | C   |     |     |     |     |     |     |     |     |     |     |     |     |     |     |     |     |     |     |     |     |     |     |
| BAK177 |             |     |     |     |     |     |     |     |     |     |     |     |     |     |     |     |     |     |     |     |     |     |     |     |     |     |
| BAK232 |             |     |     |     |     |     |     |     |     |     |     |     |     |     |     |     |     |     |     |     |     |     |     |     |     |     |
| BAK55  |             |     |     |     | C   |     |     |     |     |     |     |     |     |     |     |     |     |     |     |     |     |     |     |     |     |     |
| BAK74  |             |     |     |     |     |     |     |     |     |     |     |     |     |     |     |     |     |     |     |     |     |     |     |     |     |     |
| LOBAK2 |             |     |     | GC  |     |     |     |     |     |     |     |     |     | A   |     |     |     |     |     |     |     |     |     |     |     |     |

|        |             |     |     |     |     |     |     |     |     |     |     |     |     |     |     |     |     |     |     |     |     |     |     |     |     |     |
|--------|-------------|-----|-----|-----|-----|-----|-----|-----|-----|-----|-----|-----|-----|-----|-----|-----|-----|-----|-----|-----|-----|-----|-----|-----|-----|-----|
| AKO394 | <b>1351</b> | GAA | CTA | ACT | CAA | GAT | GAA | ATT | AAA | TGC | CGA | TGG | GAA | AAA | GGC | AAC | TCT | AAC | CCT | TTC | TAT | GAT | TCA | GGC | AGT | GAC |
| BAD348 |             |     |     |     |     |     |     | C   |     |     |     |     |     |     |     |     |     |     |     | G   |     |     |     |     |     |     |
| BAD447 |             |     |     |     |     |     |     |     |     |     |     |     |     |     |     |     |     |     |     |     |     |     |     |     |     |     |
| BAD456 |             |     |     |     |     |     |     |     |     |     |     |     |     |     |     |     |     |     |     |     |     |     |     |     |     |     |
| BAD463 |             | G   |     |     |     |     |     |     | C   |     |     |     |     |     |     |     |     |     |     |     |     | T   |     |     |     |     |
| BAD468 |             |     |     |     |     |     |     |     | C   |     |     |     |     |     |     |     |     |     |     |     |     |     | G   |     |     |     |
| BAK177 |             |     |     |     |     |     |     |     |     |     |     |     |     |     |     |     |     |     |     |     |     |     |     |     |     |     |
| BAK232 |             |     |     |     |     |     |     |     |     |     |     |     |     |     |     |     |     |     |     |     |     |     |     |     |     |     |
| BAK55  |             |     |     |     |     |     |     |     | C   |     |     |     |     |     |     |     |     |     |     |     |     |     | G   |     |     |     |
| BAK74  |             |     |     |     |     |     |     |     |     |     |     |     |     |     |     |     |     |     |     |     |     |     |     |     |     |     |
| LOBAK2 |             |     |     |     |     |     |     |     | C   |     |     |     |     |     |     |     |     |     |     |     |     |     | G   |     |     |     |

|        |             |     |     |     |     |     |     |
|--------|-------------|-----|-----|-----|-----|-----|-----|
| AKO394 | <b>1426</b> | TCA | GAT | GGC | CCC | TTT | TAA |
| BAD348 |             |     |     | A   |     |     |     |
| BAD447 |             |     |     |     |     |     |     |
| BAD456 |             |     |     |     |     |     |     |
| BAD463 |             |     |     | A   |     |     |     |
| BAD468 |             |     |     | A   |     |     |     |
| BAK177 |             |     |     | A   |     |     |     |
| BAK232 |             |     |     |     |     |     |     |
| BAK55  |             |     |     | A   |     |     |     |
| BAK74  |             |     |     |     |     |     |     |
| LOBAK2 |             |     |     | A   |     |     |     |

**Supplementary Figure S2: Alignment of SFV Bet amino-acid sequences from 11 SFV-infected hunters.** Uncultured PBMC samples from 11 SFV-infected hunters accidentally infected by a *Gorilla gorilla* SFV strain were analyzed for the presence of SFV sequences. *bet* ORF-1 and ORF-2 were sequenced and translated. Dots represent identical residues.

AKO394 **1** MDTYQEEES VAS TS GVQDLQTLSELVGP GAAGEGEDT L S DTEEVS KRS RKNTKRGAKMI TFHAYKEI EDKNPQNLKLNWI PTPEEMI NKKVQNQDLGTI LS  
 BAD348 . . . . . E . . . . . R . . . . . E . . . . .  
 BAD447 . . . . . E . . . . . D . . . . .  
 BAD456 . . . . . E . . . . .  
 BAD463 . . . . . E . . . . . R . . . . .  
 BAD468 . . . . . E . . . . . R . . . . . E . . . . .  
 BAK177 . . . E . . . . . E . . . . . R . . . . .  
 BAK232 . . . . . E . . . . . D . . . . .  
 BAK55 . . . . . E . . . . . R . . . . . E . . . . .  
 BAK74 . . . . . E . . . . . R . . . . .  
 LOBAK2 . . . . . E . . . . . R . . . . . E . . . . .

AKO394 **102** FGVKHLKGI T S LGRNDPGRDPS AMS P VLP VVTP WPFS QDHYAPTLYGI LLQYYKYS QNNEKI PRVWQFTCLEDP S GKRYMGTRI WVPPLGQVTI QFYKNFVV  
 BAD348 . D . . . . . I . . . . .  
 BAD447 . . . . .  
 BAD456 . . . . .  
 BAD463 . D . R . . . . . K . . . . .  
 BAD468 . D . . . . . I . . . . .  
 BAK177 . . . . .  
 BAK232 . . . . .  
 BAK55 . D . . . . . I . . . . .  
 BAK74 . . . . .  
 LOBAK2 . D . . . . . I . . . . .

AKO394 **205** L T V C Q A V D P W A N W F H G S E E E M Y D I E S E P D V W C S A A L C F K V I Y E G N I N Q K Q E M K S W L C R L G H G H K D G V S E F K R V D L F A M R K R K V N P Y K D K G D P W L Q Y A Y Q V K R  
 BAD348 . . I . . L . . . . . G . . . . .  
 BAD447 . . . . . G . . . . .  
 BAD456 . . . . . G . . . . .  
 BAD463 . . . . . G . . . . .  
 BAD468 . . I . . L . . . . . G . . . . .  
 BAK177 . . . . . G . . . . .  
 BAK232 . . . . . G . . . . .  
 BAK55 . . I . . L . . . . . G . . . . .  
 BAK74 . . . . . G . . . . .  
 LOBAK2 . . I . . L . . . . . G . . . . .

AKO394 **307** E T K A A N L S D Q A L R W K A L N F H R A L M C D L T N A R I G E G H V A N G Y H M A I E A Y G P Q R G S S E E R V W W K T T S T L G K D E E Y Y R S E G E E E C F P N S P A P H R R T W T E R H K V L A  
 BAD348 . . . . . G . . . . .  
 BAD447 . . . . . G . . . . . I . . . . .  
 BAD456 . . . . . G . . . . .  
 BAD463 . . . . . G . . . . . K . . . . . A . . . . .  
 BAD468 . . . . . G . . . . .  
 BAK177 . . . . . G . . . . .  
 BAK232 . . . . . G . . . . . I . . . . .  
 BAK55 . . . . . G . . . . .  
 BAK74 . . . . . G . . . . .  
 LOBAK2 . . . . . G . . . . .

AKO394 **409** L S P F A T P S D I Q K W T R A L P Y K W K V I T S D G D D Y V S M R T V K T L K E L T Q D E I K C R W E K G N S N P F Y D S G S D S D G P F \*  
 BAD348 . . . . .  
 BAD447 . . . . .  
 BAD456 . . . . .  
 BAD463 . . . . .  
 BAD468 . . . . .  
 BAK177 . . . . .  
 BAK232 . . . . .  
 BAK55 . . . . .  
 BAK74 . . . . .  
 LOBAK2 . . . . . C . . . . .
